# Supplementary material for: Prescribing Z-drugs in Greece: an analysis of the national prescription database from 2018 to 2021
Source: Springer Nature journal article supplement (doi:10.1186/s12888-023-04793-x), 2023-05-26
Supplement: MOESM1 [file 25411570]

## **eAppendix**

### **Z-drug prescribing in Greece: an analysis of the national prescription database from 2018 to 2021**

## Contents

|                                                                                                                                                |           |
|------------------------------------------------------------------------------------------------------------------------------------------------|-----------|
| <b>Contents .....</b>                                                                                                                          | <b>2</b>  |
| <b><i>eAppendix-1: Descriptive characteristics of prescriptions .....</i></b>                                                                  | <b>3</b>  |
| <b><i>eAppendix-1.1.: ICD-10 diagnoses in prescriptions (frequency &gt;1%) .....</i></b>                                                       | <b>3</b>  |
| <b><i>eAppendix-1.2.: ICD-10 diagnoses in prescriptions that did not have a sleep disorder (ICD-10 G47 or F51) (frequency &gt;1%).....</i></b> | <b>4</b>  |
| <b><i>eAppendix-1.3.: Co-prescribed medications in prescriptions (frequency &gt;1%).....</i></b>                                               | <b>5</b>  |
| <b><i>eAppendix-1.4.: Region of prescriptions.....</i></b>                                                                                     | <b>6</b>  |
| <b><i>eAppendix-2.: Differences between prescriptions by psychiatrists/neurologists vs. other specialties .....</i></b>                        | <b>8</b>  |
| <b><i>eAppendix-3: Prevalence estimates of Z-drug prescriptions stratified by age and sex in 2019 and 2020 .....</i></b>                       | <b>10</b> |

## eAppendix-1: Descriptive characteristics of prescriptions

### eAppendix-1.1.: ICD-10 diagnoses in prescriptions (frequency >1%)

Any deviations from the data presented in the manuscript can be attributed to the presentation of the specific categories of ICD-10 codes below (e.g., F51.0 and F51 were reported separately below).

| ICD10 | Description                                                                         | Number of prescriptions<br>(N=1229842) | Frequency (%) |
|-------|-------------------------------------------------------------------------------------|----------------------------------------|---------------|
| G47   | Sleep disorders                                                                     | 284408                                 | 23.13%        |
| F51.0 | Nonorganic insomnia                                                                 | 174779                                 | 14.21%        |
| F41.9 | Anxiety disorder, unspecified                                                       | 114855                                 | 9.34%         |
| F41.2 | Mixed anxiety and depressive disorder                                               | 89384                                  | 7.27%         |
| F41.1 | Generalized anxiety disorder                                                        | 83644                                  | 6.80%         |
| G47.0 | Insomnia                                                                            | 60490                                  | 4.92%         |
| F51   | Nonorganic sleep disorders                                                          | 46750                                  | 3.80%         |
| F51.9 | Sleep disorder not due to a substance or known physiological condition, unspecified | 42871                                  | 3.49%         |
| F41   | Other anxiety disorders                                                             | 37928                                  | 3.08%         |
| I10   | Essential (primary) hypertension                                                    | 29723                                  | 2.42%         |
| F32.9 | Major depressive disorder, single episode, unspecified                              | 22117                                  | 1.80%         |
| G47.9 | Sleep disorder, unspecified                                                         | 21362                                  | 1.74%         |
| F32   | Major depressive episode                                                            | 20019                                  | 1.63%         |
| F33   | Major depressive disorder, recurrent                                                | 18410                                  | 1.50%         |
| T88.7 | Unspecified adverse effect of drug or medicament                                    | 16371                                  | 1.33%         |
| E78.0 | Pure hypercholesterolemia                                                           | 15830                                  | 1.29%         |
| E11   | Type 2 diabetes mellitus                                                            | 13779                                  | 1.12%         |
| F31   | Bipolar disorder                                                                    | 13765                                  | 1.12%         |
| I11.9 | Hypertensive heart disease without heart failure                                    | 13104                                  | 1.07%         |

**eAppendix-1.2.: ICD-10 diagnoses in prescriptions that did not have a sleep disorder (ICD-10 G47 or F51) (frequency >1%)**

The ICD-10 codes refer to the ones reported in the prescriptions of Z-drugs. It was unclear if they were used as indication for the Z-drugs or other co-prescribed medications. It should also be noted that we did not have access to data for all prescriptions, i.e., prescriptions that did not contain Z-drugs, thus, the frequency of co-prescription with other medications may be underestimated.

| ICD-10 | Description                                                                   | Number of prescriptions (N=587284) | Frequency (%) |
|--------|-------------------------------------------------------------------------------|------------------------------------|---------------|
| F41.9  | Anxiety disorder, unspecified                                                 | 102177                             | 17.40%        |
| F41.2  | Mixed anxiety and depressive disorder                                         | 80768                              | 13.75%        |
| F41.1  | Generalized anxiety disorder                                                  | 75884                              | 12.92%        |
| F41    | Other anxiety disorders                                                       | 34258                              | 5.83%         |
| F32.9  | Major depressive disorder, single episode, unspecified                        | 19855                              | 3.38%         |
| F32    | Depressive episode                                                            | 18286                              | 3.11%         |
| I10    | Essential (primary) hypertension                                              | 18108                              | 3.08%         |
| F33    | Major depressive disorder, recurrent                                          | 17400                              | 2.96%         |
| F31    | Bipolar disorder                                                              | 13284                              | 2.26%         |
| F32.8  | Other depressive episodes                                                     | 11005                              | 1.87%         |
| F20    | Schizophrenia                                                                 | 10924                              | 1.86%         |
| T88.7  | Unspecified adverse effect of drug or medicament                              | 10287                              | 1.75%         |
| F34.1  | Dysthymic disorder                                                            | 10167                              | 1.73%         |
| I11.9  | Hypertensive heart disease without heart failure                              | 9722                               | 1.66%         |
| E78.0  | Pure hypercholesterolemia                                                     | 9665                               | 1.65%         |
| F29    | Unspecified psychosis not due to a substance or known physiological condition | 9586                               | 1.63%         |
| Z73.3  | Stress, not elsewhere classified                                              | 8535                               | 1.45%         |
| E11    | Type 2 diabetes mellitus                                                      | 8369                               | 1.43%         |
| F09    | Unspecified mental disorder due to known physiological condition              | 8203                               | 1.40%         |
| F39    | Unspecified mood [affective] disorder                                         | 7410                               | 1.26%         |

**eAppendix-1.3.: Co-prescribed medications in prescriptions (frequency >1%)**

It should be noted that we did not have access to data for all prescriptions, i.e., prescriptions that did not contain Z-drugs, thus, the frequency of co-prescription with other medications may be underestimated.

| ATC code | Description                        | Number of prescriptions (N=1229842) | Frequency (%) |
|----------|------------------------------------|-------------------------------------|---------------|
| None     | No other co-prescribed medications | 593019                              | 48.22%        |
| N05BA08  | bromazepam                         | 156881                              | 12.76%        |
| N05BA12  | alprazolam                         | 142370                              | 11.58%        |
| N02BE51  | paracetamol                        | 92065                               | 7.49%         |
| N05BA06  | lorazepam                          | 53293                               | 4.33%         |
| C10AA05  | atorvastatin                       | 41188                               | 3.35%         |
| A02BC01  | omeprazole                         | 32087                               | 2.61%         |
| B01AC04  | clopidogrel                        | 21943                               | 1.78%         |
| N05BA01  | diazepam                           | 21862                               | 1.78%         |
| C10AA01  | simvastatin                        | 21222                               | 1.73%         |
| B01AC06  | acetylsalicylic acid               | 20978                               | 1.71%         |
| N06AB04  | citalopram                         | 20073                               | 1.63%         |
| H03AA01  | levothyroxine sodium               | 19954                               | 1.62%         |
| N05AH04  | quetiapine                         | 19012                               | 1.55%         |
| N06AB10  | escitalopram                       | 17781                               | 1.45%         |
| N06AX11  | mirtazapine                        | 17329                               | 1.41%         |
| A10BA02  | metformin                          | 17201                               | 1.40%         |
| C08CA01  | amlodipine                         | 16546                               | 1.35%         |
| C03CA01  | furosemide                         | 16019                               | 1.30%         |
| C09DA04  | Irbesartan and diuretics           | 14700                               | 1.20%         |
| M04AA01  | allopurinol                        | 14555                               | 1.18%         |
| C07AB12  | nebivolol                          | 13900                               | 1.13%         |
| A02BC02  | pantoprazole                       | 13448                               | 1.09%         |
| C07AG02  | carvedilol                         | 13437                               | 1.09%         |
| N06AX16  | venlafaxine                        | 12804                               | 1.04%         |

## eAppendix-1.4.: Region of prescriptions

The prescriptions per region in Greece and their percentage to the total number of prescriptions (1229842) within the 3-year period are presented below. The percentage of prescriptions per region (“observed”) was compared with the percentage of the population of the region (using the average of the population estimates for the 3-year period, total 10715740) (“expected”). We did not statistically test the differences (e.g., with a one-proportion z-test), since even small differences between observed and expected proportions would have been highly significant due to the large sample size.

| Region            | Number of prescriptions in the region within the 3-year period (N=1229842) | % Prescriptions | Population of the region (average within the 3-year period) (N=10,715,740) | % Population | Differences of the two proportions |
|-------------------|----------------------------------------------------------------------------|-----------------|----------------------------------------------------------------------------|--------------|------------------------------------|
| ATTIKI            | 411456                                                                     | 33.46%          | 3743582                                                                    | 34.94%       | -1.48%                             |
| THESSALONIKI      | 111833                                                                     | 9.09%           | 1102760                                                                    | 10.29%       | -1.20%                             |
| LARISSA           | 27613                                                                      | 2.25%           | 280383.5                                                                   | 2.62%        | -0.37%                             |
| ACHAEA            | 25837                                                                      | 2.10%           | 298051.3                                                                   | 2.78%        | -0.68%                             |
| MAGNESIA          | 23715                                                                      | 1.93%           | 202684.8                                                                   | 1.89%        | 0.04%                              |
| SERRES            | 22955                                                                      | 1.87%           | 166686.5                                                                   | 1.56%        | 0.31%                              |
| DODEKANISA        | 20882                                                                      | 1.70%           | 218258.8                                                                   | 2.04%        | -0.34%                             |
| HERAKLION         | 18123                                                                      | 1.47%           | 314208.8                                                                   | 2.93%        | -1.46%                             |
| PIERIA            | 17730                                                                      | 1.44%           | 131773.5                                                                   | 1.23%        | 0.21%                              |
| AETOLIA-ACARNANIA | 17709                                                                      | 1.44%           | 199764.5                                                                   | 1.86%        | -0.42%                             |
| IOANNINA          | 17682                                                                      | 1.44%           | 167577.8                                                                   | 1.56%        | -0.13%                             |
| CHANIA            | 17269                                                                      | 1.40%           | 159691                                                                     | 1.49%        | -0.09%                             |
| LESBOS            | 17049                                                                      | 1.39%           | 115858.5                                                                   | 1.08%        | 0.31%                              |
| EYBOEA            | 15883                                                                      | 1.29%           | 212827.5                                                                   | 1.99%        | -0.69%                             |
| IMATHIA           | 15829                                                                      | 1.29%           | 141403.8                                                                   | 1.32%        | -0.03%                             |
| PELLA             | 15826                                                                      | 1.29%           | 136753.5                                                                   | 1.28%        | 0.01%                              |
| PHTIOTIS          | 15174                                                                      | 1.23%           | 158972.5                                                                   | 1.48%        | -0.25%                             |
| KAVALA            | 15147                                                                      | 1.23%           | 133041.3                                                                   | 1.24%        | -0.01%                             |
| MESSENIA          | 14329                                                                      | 1.17%           | 157826.5                                                                   | 1.47%        | -0.31%                             |

|                |       |       |          |           |        |
|----------------|-------|-------|----------|-----------|--------|
| CORFU          | 13236 | 1.08% | 101355.3 | 0.95<br>% | 0.13%  |
| CORINT<br>H    | 12532 | 1.02% | 147479.5 | 1.38<br>% | -0.36% |
| XANTHI         | 12481 | 1.01% | 111442.3 | 1.04<br>% | -0.03% |
| CYCLA<br>DES   | 12385 | 1.01% | 126805.5 | 1.18<br>% | -0.18% |
| KOZANI         | 12125 | 0.99% | 139516   | 1.30<br>% | -0.32% |
| KILKIS         | 11784 | 0.96% | 80269.5  | 0.75<br>% | 0.21%  |
| ILIA           | 11553 | 0.94% | 155282.8 | 1.45<br>% | -0.51% |
| VIOTIA         | 11069 | 0.90% | 122348   | 1.14<br>% | -0.24% |
| EVROS          | 11062 | 0.90% | 147087.8 | 1.37<br>% | -0.47% |
| DRAMA          | 11018 | 0.90% | 96665.75 | 0.90<br>% | -0.01% |
| KARDIT<br>SA   | 10796 | 0.88% | 104724.5 | 0.98<br>% | -0.10% |
| TRIKAL<br>A    | 10751 | 0.87% | 128614.3 | 1.20<br>% | -0.33% |
| CHALKI<br>DIKI | 9775  | 0.79% | 110510.5 | 1.03<br>% | -0.24% |
| RODOPI         | 8167  | 0.66% | 110367   | 1.03<br>% | -0.37% |
| ARGOLI<br>DA   | 8017  | 0.65% | 96317.25 | 0.90<br>% | -0.25% |
| ΛΑΚΩΝΙ<br>A    | 7790  | 0.63% | 90271.75 | 0.84<br>% | -0.21% |
| RETHY<br>MNO   | 6268  | 0.51% | 87653    | 0.82<br>% | -0.31% |
| SAMOS          | 6103  | 0.50% | 48566.5  | 0.45<br>% | 0.04%  |
| ARKADI<br>A    | 5926  | 0.48% | 81278    | 0.76<br>% | -0.28% |
| CHIOS          | 5587  | 0.45% | 58301.5  | 0.54<br>% | -0.09% |
| FLORIN<br>A    | 5526  | 0.45% | 49334.5  | 0.46<br>% | -0.01% |
| PREVEZ<br>A    | 4696  | 0.38% | 57908.25 | 0.54<br>% | -0.16% |
| ARTA           | 4446  | 0.36% | 62558.25 | 0.58<br>% | -0.22% |
| KEFALO<br>NIA  | 4379  | 0.36% | 38631.75 | 0.36<br>% | 0.00%  |
| THESP<br>ROTIA | 4176  | 0.34% | 45026.5  | 0.42<br>% | -0.08% |
| LASITHI        | 3784  | 0.31% | 73873.75 | 0.69<br>% | -0.38% |
| KASTO<br>RIA   | 3447  | 0.28% | 46354.75 | 0.43<br>% | -0.15% |
| FOKIDA         | 3362  | 0.27% | 42356.25 | 0.40<br>% | -0.12% |
| ZAKYNT<br>HOS  | 3086  | 0.25% | 39682.25 | 0.37<br>% | -0.12% |
| GREVE<br>NA    | 3037  | 0.25% | 30532.75 | 0.28<br>% | -0.04% |
| LEYKAD<br>A    | 2317  | 0.19% | 23818.5  | 0.22<br>% | -0.03% |
| EVRITA<br>NIA  | 1352  | 0.11% | 18700.75 | 0.17<br>% | -0.06% |

## eAppendix-2.: Differences between prescriptions by psychiatrists/neurologists vs. other specialties

| Variables                                                                                                           | Prescriptions by psychiatrists/neurologists (n=209175)                         | Prescription by other medical specialties (n=1020667)                           | Effect size of prescriptions by psychiatrists/neurologists vs. other medical specialties |
|---------------------------------------------------------------------------------------------------------------------|--------------------------------------------------------------------------------|---------------------------------------------------------------------------------|------------------------------------------------------------------------------------------|
| Z-drug (zolpidem vs. only zopiclone)                                                                                | 85.4%                                                                          | 90.5%                                                                           | OR=0.61, 95%CI: 0.60, 0.62                                                               |
| Age (years)                                                                                                         | Median 69 years, IQR [57; 80]                                                  | Median 78 years, IQR [69; 86]                                                   | A=0.33 (medium)                                                                          |
| Sex (% female)                                                                                                      | 65.9%                                                                          | 70.4%                                                                           | OR=0.81, 95%CI: 0.80, 0.82                                                               |
| Region (% Attica/Thessaloniki)                                                                                      | 62.1%                                                                          | 45.4%                                                                           | OR=1.97, 95%CI: 1.95, 1.99                                                               |
| Sleep disorders (G47/F51)                                                                                           | 27.9%                                                                          | 57.2%                                                                           | OR=0.29, 95%CI: 0.29, 0.29                                                               |
| Specific sleep disorder diagnosis (F51 vs. G47)                                                                     | There were 58343 prescriptions with F51 or G47, and F51 was indicated in 46.2% | There were 584124 prescriptions with F51 or G47, and F51 was indicated in 41.2% | OR=1.22, 95%CI: 1.20, 1.24                                                               |
| Anxiety or depressive disorders (ICD-10: F40/F41/F32/F33)                                                           | 43.2%                                                                          | 33.5%                                                                           | OR=1.51, 95%CI: 1.50, 1.52                                                               |
| Anxiety disorders (ICD-10: F40/F41)                                                                                 | 25.2%                                                                          | 27.6%                                                                           | OR=0.88, 95%CI: 0.87, 0.89                                                               |
| Depressive disorders (ICD-10: F32/F33)                                                                              | 18.5%                                                                          | 6.0%                                                                            | OR=3.53, 95%CI: 3.49, 3.58                                                               |
| Co-prescribed anxiolytics (ATC: N05B)                                                                               | 45.7%                                                                          | 27.9%                                                                           | OR=2.18, 95%CI: 2.16, 2.20                                                               |
| Co-prescribed antidepressants (ATC: N06A)                                                                           | 14.2%                                                                          | 6.3%                                                                            | OR=2.45, 95%CI: 2.41, 2.49                                                               |
| Co-prescribed nonopioid analgesic (ATC: N02B)                                                                       | 2.8%                                                                           | 8.4%                                                                            | OR=0.31, 95%CI: 0.30, 0.32                                                               |
| Co-prescribed antipsychotics (ATC: N05A)                                                                            | 8.8%                                                                           | 1.9%                                                                            | OR=4.95, 95%CI: 4.85, 5.05                                                               |
| Co-prescribed antiepileptics (ATC: N03A)                                                                            | 3.3%                                                                           | 1.5%                                                                            | OR=2.33, 95%CI: 2.26, 2.40                                                               |
| Co-prescribed opioid analgesics (ATC: N02A)                                                                         | 0.6%                                                                           | 1.9%                                                                            | OR=0.29, 95%CI: 0.27, 0.30                                                               |
| Co-prescribed anxiolytic or antidepressants in prescriptions that had a diagnosis of anxiety or depressive disorder | 63.1%                                                                          | 44.6%                                                                           | OR=2.13, 95%CI: 2.10, 2.16                                                               |

The effect-size for continuous variables was mean difference in case normality (tested with a t-test), otherwise the Vargha's and Delaney's A (tested with a Mann-Whitney



test). The effect-size for dichotomous variables was odds ratios (tested with a chi-squared). Due to the large sample size of the study, p-value were  $<0.001$  in all cases. \*We did not have access to data for all prescriptions, i.e., prescriptions that did not contain Z-drugs, thus, the frequency of co-prescription with other medications may be underestimated.

### eAppendix-3: Prevalence estimates of Z-drug prescriptions stratified by age and sex in 2019 and 2020

The estimated overall prevalence standardized by age group and sex was 0.85% in 2019 and 0.89% in 2020.

Differences in the prevalence between the two years per age group and sex were compared with odds ratios (ORs) and their 95% confidence intervals (95%CI).

\*The age group <20 years was not presented due to the small number of prescriptions. An increase in the prevalence of Z-prescriptions in this age group was generally noted between 2020 vs. 2019 (males: OR=2.14, 95%CI [0.87, 5.26], females: OR=3.60 95%CI [1.55, 8.3], both: OR=2.87, 95%CI [1.56, 5.27]).

|         | Age group | 2019                                                           |                                                                           |       | 2020                                                           |                                                                           |       | ORs for 2020 vs. 2019 |                             |                             | Weighted average of the prevalence of 2019-2020 |
|---------|-----------|----------------------------------------------------------------|---------------------------------------------------------------------------|-------|----------------------------------------------------------------|---------------------------------------------------------------------------|-------|-----------------------|-----------------------------|-----------------------------|-------------------------------------------------|
|         |           | Number of people receiving at least one prescription (N=91504) | Estimated population from the Hellenic Statistical Authority (N=10724599) | %     | Number of people receiving at least one prescription (N=95537) | Estimated population from the Hellenic Statistical Authority (N=10718565) | %     | OR                    | Lower boundary of the 95%CI | Upper boundary of the 95%CI |                                                 |
| females | 20-24     | 61                                                             | 265850                                                                    | 0.02% | 95                                                             | 266429                                                                    | 0.04% | 1.55                  | 1.13                        | 2.14                        | 0.03%                                           |
|         | 25-29     | 132                                                            | 279643                                                                    | 0.05% | 181                                                            | 274065                                                                    | 0.07% | 1.40                  | 1.12                        | 1.75                        | 0.06%                                           |
|         | 30-34     | 210                                                            | 305389                                                                    | 0.07% | 308                                                            | 298181                                                                    | 0.10% | 1.50                  | 1.26                        | 1.79                        | 0.09%                                           |
|         | 35-39     | 361                                                            | 382507                                                                    | 0.09% | 468                                                            | 367204                                                                    | 0.13% | 1.35                  | 1.18                        | 1.55                        | 0.11%                                           |
|         | 40-44     | 756                                                            | 404656                                                                    | 0.19% | 998                                                            | 402081                                                                    | 0.25% | 1.33                  | 1.21                        | 1.46                        | 0.22%                                           |
|         | 45-49     | 1287                                                           | 412102                                                                    | 0.31% | 1582                                                           | 408394                                                                    | 0.39% | 1.24                  | 1.15                        | 1.34                        | 0.35%                                           |
|         | 50-54     | 2164                                                           | 405972                                                                    | 0.53% | 2661                                                           | 413336                                                                    | 0.64% | 1.21                  | 1.14                        | 1.28                        | 0.59%                                           |
|         | 55-59     | 3205                                                           | 380563                                                                    | 0.84% | 3762                                                           | 379760                                                                    | 0.99% | 1.18                  | 1.12                        | 1.24                        | 0.92%                                           |
| 60-64   | 4535      | 355526                                                         | 1.28%                                                                     | 4982  | 362278                                                         | 1.38%                                                                     | 1.08  | 1.04                  | 1.12                        | 1.33%                       |                                                 |

|       |       |       |        |       |       |        |       |      |      |      |       |
|-------|-------|-------|--------|-------|-------|--------|-------|------|------|------|-------|
|       | 65-69 | 5744  | 321158 | 1.79% | 6265  | 323057 | 1.94% | 1.09 | 1.05 | 1.13 | 1.86% |
|       | 70-74 | 7200  | 301680 | 2.39% | 7850  | 307835 | 2.55% | 1.07 | 1.04 | 1.11 | 2.47% |
|       | 75-79 | 8532  | 243441 | 3.50% | 8777  | 240669 | 3.65% | 1.04 | 1.01 | 1.07 | 3.58% |
|       | 80-84 | 10015 | 230859 | 4.34% | 9892  | 231560 | 4.27% | 0.98 | 0.96 | 1.01 | 4.30% |
|       | 85+   | 17218 | 216920 | 7.94% | 15550 | 223368 | 6.96% | 0.87 | 0.85 | 0.89 | 7.44% |
| males | 20-24 | 51    | 286472 | 0.02% | 106   | 293177 | 0.04% | 2.03 | 1.45 | 2.84 | 0.03% |
|       | 25-29 | 137   | 289329 | 0.05% | 210   | 290611 | 0.07% | 1.53 | 1.23 | 1.89 | 0.06% |
|       | 30-34 | 225   | 304326 | 0.07% | 279   | 298257 | 0.09% | 1.27 | 1.06 | 1.51 | 0.08% |
|       | 35-39 | 329   | 383663 | 0.09% | 472   | 369591 | 0.13% | 1.49 | 1.29 | 1.72 | 0.11% |
|       | 40-44 | 615   | 397530 | 0.15% | 810   | 397708 | 0.20% | 1.32 | 1.19 | 1.46 | 0.18% |
|       | 45-49 | 951   | 393951 | 0.24% | 1083  | 391322 | 0.28% | 1.15 | 1.05 | 1.25 | 0.26% |
|       | 50-54 | 1361  | 376235 | 0.36% | 1587  | 384485 | 0.41% | 1.14 | 1.06 | 1.23 | 0.39% |
|       | 55-59 | 1673  | 338020 | 0.49% | 1967  | 337891 | 0.58% | 1.18 | 1.10 | 1.26 | 0.54% |
|       | 60-64 | 2320  | 316380 | 0.73% | 2704  | 320371 | 0.84% | 1.15 | 1.09 | 1.22 | 0.79% |
|       | 65-69 | 2992  | 285694 | 1.05% | 3286  | 285945 | 1.15% | 1.10 | 1.05 | 1.15 | 1.10% |
|       | 70-74 | 3628  | 255713 | 1.42% | 3974  | 260444 | 1.53% | 1.08 | 1.03 | 1.13 | 1.47% |
|       | 75-79 | 3813  | 195153 | 1.95% | 4145  | 195010 | 2.13% | 1.09 | 1.04 | 1.14 | 2.04% |
|       | 80-84 | 4415  | 163766 | 2.70% | 4513  | 164264 | 2.75% | 1.02 | 0.98 | 1.06 | 2.72% |
|       | 85+   | 7560  | 148889 | 5.08% | 6990  | 154048 | 4.54% | 0.89 | 0.86 | 0.92 | 4.80% |
| all   | 20-24 | 112   | 552322 | 0.02% | 201   | 559606 | 0.04% | 1.77 | 1.41 | 2.23 | 0.03% |
|       | 25-29 | 269   | 568972 | 0.05% | 391   | 564676 | 0.07% | 1.46 | 1.25 | 1.71 | 0.06% |
|       | 30-34 | 435   | 609715 | 0.07% | 587   | 596438 | 0.10% | 1.38 | 1.22 | 1.56 | 0.08% |
|       | 35-39 | 690   | 766170 | 0.09% | 940   | 736795 | 0.13% | 1.42 | 1.28 | 1.56 | 0.11% |
|       | 40-44 | 1371  | 802186 | 0.17% | 1808  | 799789 | 0.23% | 1.32 | 1.23 | 1.42 | 0.20% |
|       | 45-49 | 2238  | 806053 | 0.28% | 2665  | 799716 | 0.33% | 1.20 | 1.14 | 1.27 | 0.31% |
|       | 50-54 | 3525  | 782207 | 0.45% | 4248  | 797821 | 0.53% | 1.18 | 1.13 | 1.24 | 0.49% |
|       | 55-59 | 4878  | 718583 | 0.68% | 5729  | 717651 | 0.80% | 1.18 | 1.13 | 1.22 | 0.74% |

|  |       |       |        |       |       |        |       |      |      |      |       |
|--|-------|-------|--------|-------|-------|--------|-------|------|------|------|-------|
|  | 60-64 | 6855  | 671906 | 1.02% | 7686  | 682649 | 1.13% | 1.10 | 1.07 | 1.14 | 1.07% |
|  | 65-69 | 8736  | 606852 | 1.44% | 9551  | 609002 | 1.57% | 1.09 | 1.06 | 1.12 | 1.50% |
|  | 70-74 | 10828 | 557393 | 1.94% | 11824 | 568279 | 2.08% | 1.07 | 1.04 | 1.10 | 2.01% |
|  | 75-79 | 12345 | 438594 | 2.81% | 12922 | 435679 | 2.97% | 1.06 | 1.03 | 1.08 | 2.89% |
|  | 80-84 | 14430 | 394625 | 3.66% | 14405 | 395824 | 3.64% | 1.00 | 0.97 | 1.02 | 3.65% |
|  | 85+   | 24778 | 365809 | 6.77% | 22540 | 377416 | 5.97% | 0.87 | 0.86 | 0.89 | 6.37% |
